# Supplementary material for: Novel Isoform DTX3c Associates with UBE2N-UBA1 and Cdc48/p97 as Part of the EphB4 Degradation Complex Regulated by the Autocrine IGF-II/IRA Signal in Malignant Mesothelioma
Source: MDPI journal article supplement (doi:10.3390/ijms24087380), 2023-04-17
Supplement: s1 [file s1]

**Supplemental Table S1. Antibodies and related reagents used for the study**

| <i>Antigen (/Ab Clone)</i>              | <i>Animal source/<br/>clonality</i> | <i>Working<br/>concentration</i> | <i>Provider</i>       | <i>Clone /product#</i> |
|-----------------------------------------|-------------------------------------|----------------------------------|-----------------------|------------------------|
| $\alpha$ -IGF-II neutralizing mAb       | goat monoclonal                     | 1.15 $\mu$ g/ml                  | R&D Systems           | AF292                  |
| $\alpha$ -EphB4 (H-10)                  | mouse monoclonal                    | 1:2000                           | Santa Cruz            | H-10/sc-365510         |
| $\alpha$ -VCP(cdc48)/p97(D9)            | mouse monoclonal                    | 1:1000                           | Santa Cruz            | D-9/sc133212           |
| $\alpha$ -VCP(cdc48)/p97                | rabbit polyclonal                   | 1:1000                           | Sigma Aldrich         | HPA012728              |
| $\alpha$ -DTX3 (C10)                    | mouse monoclonal                    | 1:1000                           | Santa Cruz            | C10/sc376439           |
| $\alpha$ -UBA1 (2G2)                    | mouse monoclonal                    | 1:1000                           | Santa Cruz            | 2G2/sc53555            |
| $\alpha$ -UBE2N (4E11)                  | mouse monoclonal                    | 1:1000                           | Santa Cruz            | 4E11/sc58452           |
| $\alpha$ -Ubiquitin (P4D1)              | mouse monoclonal                    | 1:1000                           | Santa Cruz            | P4D1/sc8017            |
| Anti-mouse IgG-HRP                      | chicken<br>monoclonal               | 1:2000                           | Santa Cruz            | sc2954                 |
| Anti-IgGk-LC-HRP                        | mouse monoclonal                    | 1:1000                           | Santa Cruz            | sc156102               |
| Anti-mouse-IgG-mag<br>beads (Dynabeads) | goat                                | 2 $\mu$ l/ml                     | Dynal Biotech         | 110.33                 |
| Streptavidin mag beads                  | n/a                                 | 2 $\mu$ l/ml                     | Genscript             | L00424                 |
| Protein A/G beads                       | n/a                                 | 10 $\mu$ l/condition             | Oncogene              |                        |
| MagnaChip Protein A/G<br>Magnetic Bead  | n/a                                 | 5 $\mu$ l/condition              | Millipore             | 16-663X                |
| Dimethyl-pimelimidate                   | n/a                                 | 20 mM                            | Sigma Aldrich         | D8388                  |
| SPDP                                    | n/a                                 | 2 mM                             | Sigma Aldrich         | P3415                  |
| Ubiquitin, human synthetic              | n/a                                 | 800 ng/rxn                       | Boston<br>Biochemical | U-100H                 |
| MG132                                   | n/a                                 | 200 nM                           | Calbiochem            | 474790                 |
| ML240                                   | n/a                                 | 200 nM                           | SIGMA                 | SML1071                |
